# Supplementary material for: Identification of Acinetobacter baumannii and its carbapenem-resistant gene blaOXA-23-like by multiple cross displacement amplification combined with lateral flow biosensor
Source: PubMed Central journal article supplement (PMC6884502; doi:10.1038/s41598-019-54465-8), 2019-11-29
Supplement: 41598_2019_54465_MOESM1_ESM.pdf [file 41598_2019_54465_MOESM1_ESM.pdf]

Identification of *Acinetobacter baumannii* and its carbapenem-resistant gene *bla*<sub>OXA-23-like</sub> by multiple cross displacement amplification combined with lateral flow biosensor

**Authors:**

Shoukui Hu<sup>1,†</sup>, Lina Niu<sup>1,2,†</sup>, Fan Zhao<sup>1,†</sup>, Linlin Yan<sup>1,†</sup>, Jinqing Nong<sup>1</sup>, Chunmei Wang<sup>1</sup>, Naishu Gao<sup>1</sup>, Xiaoxue Zhu<sup>1</sup>, Lei Wu<sup>1</sup>, Tianhui Bo<sup>1</sup>, Hongyu Wang<sup>1</sup>, Jin Gu<sup>1\*</sup>

(a)

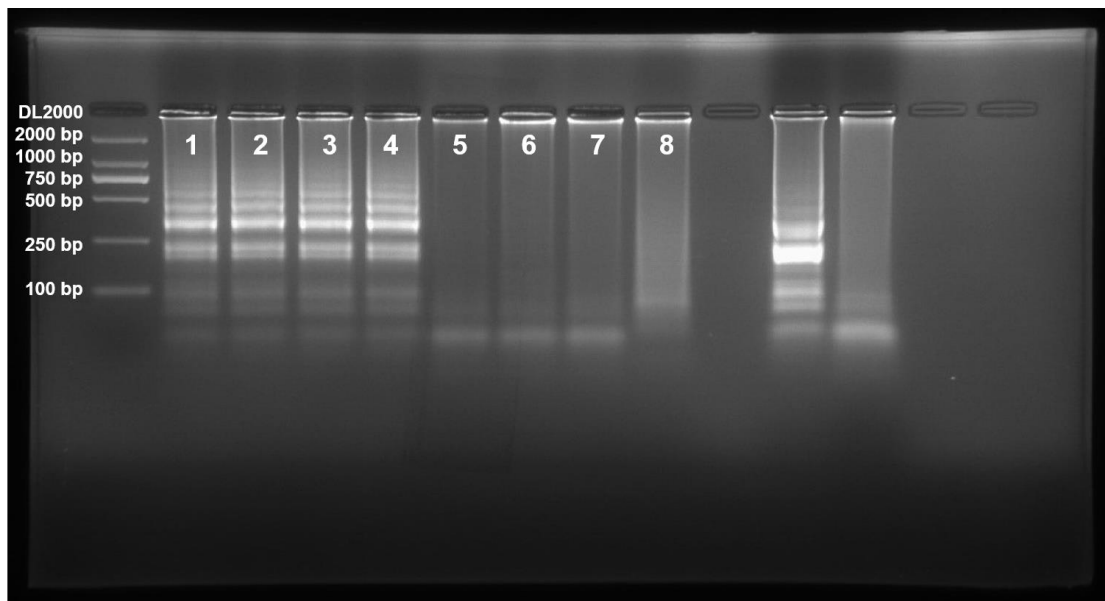

(b)

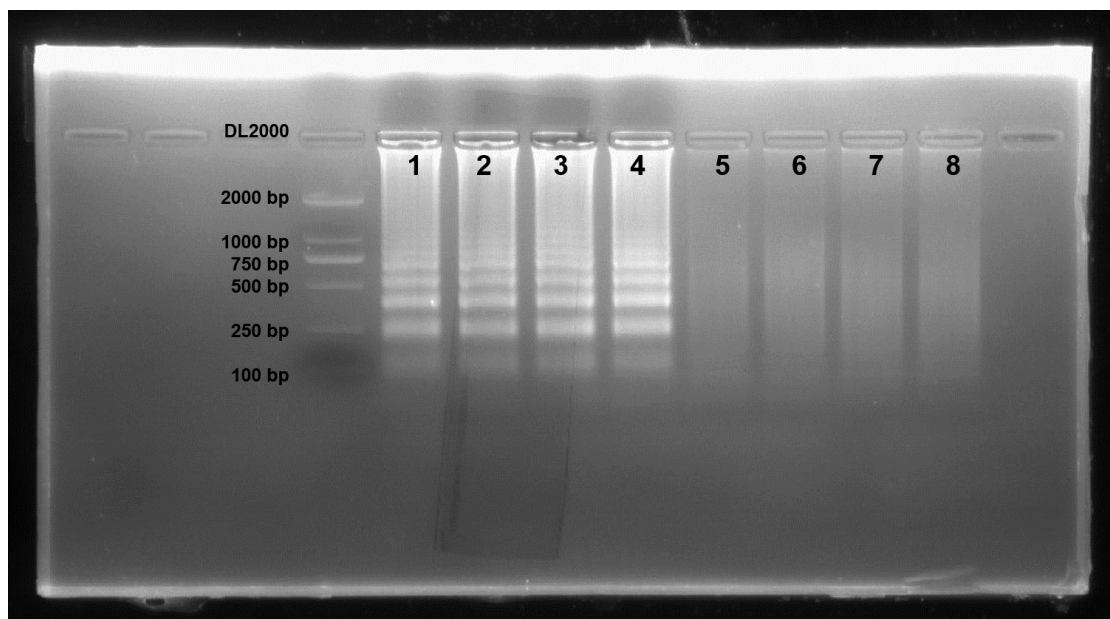

**Figure S1. Detection of a single target in a MCDA reaction.** Two sets of MCDA

primers targeting the *pgaD* (a) and *bla<sub>OXA-23-like</sub>* (b) genes were used in different reactions and the serial dilutions (10 ng, 10 pg, 1 pg, 100 fg, 10 fg and 1 fg) of target templates were subjected to MCDA reactions. (a) and (b), gel electrophoresis applied for analysis of *pgaD*- and *bla<sub>OXA-23-like</sub>*-MCDA products. Signals/Tubes/Biosensors/Lanes 1-6: *A. baumannii* (SG-AB001) genomic templates (10 ng-1fg); Signal/Tube/Biosensor/Lane 7: negative control (*K. pneumoniae*); Signal/Tube/Biosensor/Lane 8: blank control (DW).
